# Supplementary material for: P-Doped Carbon Quantum Dots with Antibacterial Activity
Source: MDPI journal article supplement (doi:10.3390/mi12091116), 2021-09-16
Supplement: s1 [file s1]

# Supplementary Materials: P-Doped Carbon Quantum Dots with Antibacterial Activity

Shuiqin Chai <sup>1,2,\*</sup>, Lijia Zhou <sup>2</sup>, Shuchen Pei <sup>1,2</sup>, Zhiyuan Zhu <sup>3,4</sup> and Bin Chen <sup>3,\*</sup>

<sup>1</sup> Chongqing Key Laboratory of Industrial Fermentation Microorganism, Chongqing University of Science and Technology, No. 20 East Daxuecheng Road, Chongqing 401331, China; peishuchen928@163.com

<sup>2</sup> College of Chemistry and Chemical Engineering, Chongqing University of Science and Technology, No. 20 East Daxuecheng Road, Chongqing 401331, China; lijiazhou1128@163.com

<sup>3</sup> Chongqing Key Laboratory of Non-linear Circuit and Intelligent Information Processing, College of Electronic and Information Engineering, Southwest University, Chongqing 400715, China; zyuanzhu@swu.edu.cn

<sup>4</sup> Ocean College, Zhejiang University, Hangzhou 316021, China

\* Correspondence: chai0104sq@126.com (S.C.); chenbin121@swu.edu.cn (B.C.); Tel.: +86-23-6825-0394 (B.C.)

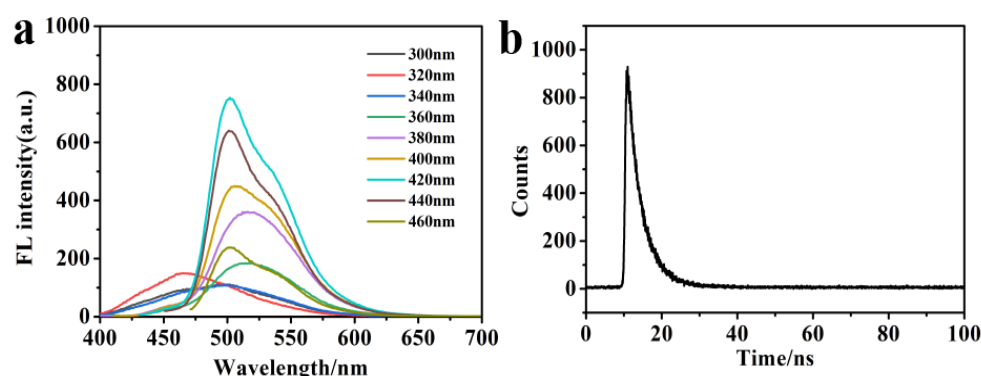

**Figure S1.** (a) Fluorescent emission spectra of P-doped CQDs under different excitation wavelengths from 300 to 460 nm. (b) Fluorescence lifetime of P-doped CQDs.

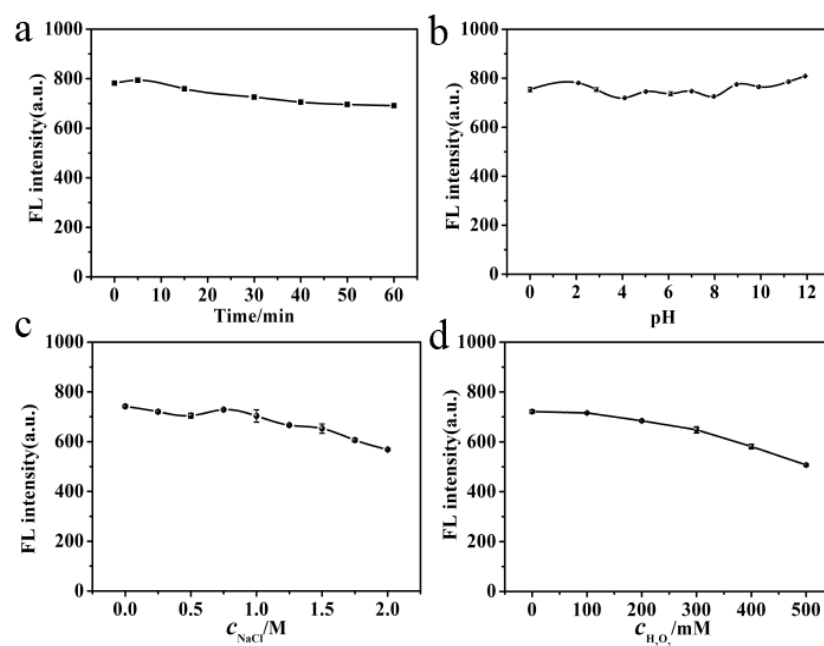

**Figure S2.** Fluorescent spectra of P-doped CQDs in different incubation time (a), pH solutions (b) and different concentration of NaCl (c),  $H_2O_2$  (d).

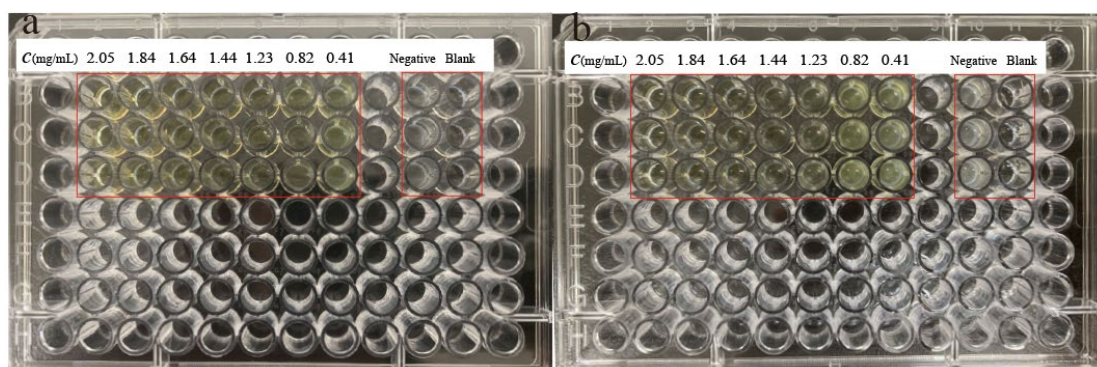

**Figure S3.** The antibacterial ability of P-doped CQDs on *E. coli* (a) and *S. aureus* (b).

**Table S1.** OD values of *E. coli* treated with different concentrations of P-doped CQDs.

| $c_{CQDs}$<br>(mg/mL) | 2.05  | 1.84  | 1.64  | 1.44  | 1.23  | 0.82  | 0.41  | Negative<br>group | Blank<br>group |
|-----------------------|-------|-------|-------|-------|-------|-------|-------|-------------------|----------------|
| OD                    | 0.116 | 0.101 | 0.089 | 0.084 | 0.072 | 0.178 | 0.226 | 0.480             | 0.047          |
|                       | 0.110 | 0.099 | 0.087 | 0.085 | 0.074 | 0.112 | 0.261 | 0.452             | 0.044          |
|                       | 0.108 | 0.092 | 0.092 | 0.087 | 0.070 | 0.139 | 0.221 | 0.470             | 0.045          |

**Table S2.** OD values of *S. aureus* treated with different concentrations of P-doped CQDs.

| $c_{CQDs}$<br>(mg/mL) | 2.05  | 1.84  | 1.64  | 1.44  | 1.23  | 0.82  | 0.41  | Negative<br>group | Blank<br>group |
|-----------------------|-------|-------|-------|-------|-------|-------|-------|-------------------|----------------|
| OD                    | 0.099 | 0.082 | 0.070 | 0.061 | 0.223 | 0.489 | 0.501 | 0.574             | 0.043          |
|                       | 0.102 | 0.087 | 0.063 | 0.060 | 0.229 | 0.447 | 0.580 | 0.475             | 0.041          |
|                       | 0.095 | 0.088 | 0.061 | 0.064 | 0.202 | 0.437 | 0.521 | 0.614             | 0.043          |
